# Supplementary material for: Quantitative Zn speciation in zinc-containing steelmaking wastes by X-ray absorption spectroscopy
Source: Royal Society of Chemistry journal article supplement (doi:10.1039/c2ja30094j), 2012-01-01
Supplement: c2ja30094j.pdf [file c2ja30094j.pdf]

## Supporting information

### Quantitative Zn speciation in zinc-containing steelmaking wastes by

### X-ray absorption spectroscopy

Lihua Wang<sup>a</sup>, Xiaoming Lu<sup>b</sup>, Xiangjun Wei<sup>a</sup>, Zheng Jiang<sup>a</sup>, Songqi Gu<sup>a</sup>, Qian Gao<sup>a</sup>, Yuying Huang<sup>a\*</sup>

*a Shanghai Synchrotron Radiation Facility, Shanghai Institute of Applied Physics, Chinese Academy of Sciences, Shanghai 201204, P. R. China. Email: huangyuying@sinap.ac.cn*

*b Research Institute, Baoshan Iron and Steel Co., LTD., Shanghai 201900, P.R. China*

### S1 Results of XRF analysis

Table S1 Chemical composition of zinc-containing steelmaking wastes analyzed by wavelength dispersive XRF spectroscopy (wt%)

| Samples | TFe* | SiO <sub>2</sub> | MgO | CaO  | Al <sub>2</sub> O <sub>3</sub> | MnO | P <sub>2</sub> O <sub>5</sub> | ZnO  |
|---------|------|------------------|-----|------|--------------------------------|-----|-------------------------------|------|
| EAFD    | 38.0 | 4.1              | 2.5 | 8.3  | 1.0                            | 3.0 | 0.4                           | 20.4 |
| BFS     | 48.1 | 5.4              | 0.3 | 2.1  | 2.1                            | 0.2 | 0.2                           | 0.03 |
| BFD     | 47.5 | 4.8              | 0.4 | 2.6  | 2.1                            | 0.2 | 0.1                           | 0.06 |
| BOF OG  | 54.1 | 1.2              | 5.7 | 12.7 | 0.2                            | 0.7 | 0.2                           | 3.4  |
| BOF LT  | 60.2 | 1.3              | 3.0 | 8.0  | 0.3                            | 0.6 | 0.2                           | 1.6  |

\* Total content of iron.

## S2. Results of SR-XRD analysis

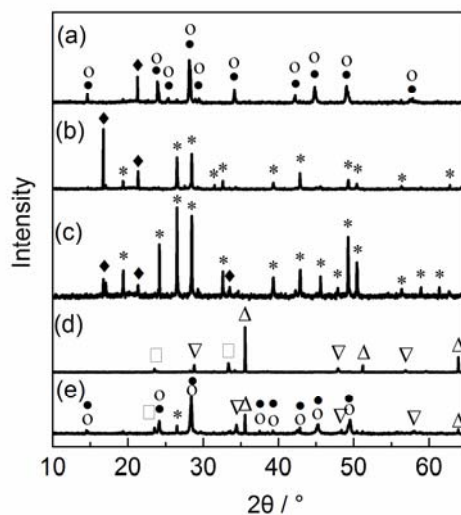

Fig. S1 Results of XRD analysis of zinc-containing steelmaking wastes: (a) EAFD; (b) BFS; (c) BFD; (d) BOF OG; (e) BOF LT; ( \* ) hematite -  $\text{Fe}_2\text{O}_3$  (PDF: 33-0664); (○) magnetite -  $\text{Fe}_3\text{O}_4$  (PDF: 75-0499); (●) franklinite- $\text{ZnFe}_2\text{O}_4$  (PDF: 73-1693); ( $\Delta$ ) metallic iron -  $\text{Fe}$  (PDF: 87-0721); ( $\nabla$ ) iron oxide- $\text{FeO}$  (PDF: 89-0687); (◆) quartz- $\text{SiO}_2$  (PDF: 83-0539); (◻) calcite- $\text{CaCO}_3$  (PDF: 86-2343).

Table S2 Mineral phases contained in zinc-containing steelmaking wastes by SR-XRD analysis

| Sample | Mineral phases                                                                                                           |
|--------|--------------------------------------------------------------------------------------------------------------------------|
| EAFD   | $\text{ZnFe}_2\text{O}_4/\text{Fe}_3\text{O}_4$ , $\text{SiO}_2$                                                         |
| BFS    | $\text{Fe}_2\text{O}_3$ , $\text{SiO}_2$                                                                                 |
| BFD    | $\text{Fe}_2\text{O}_3$ , $\text{SiO}_2$                                                                                 |
| BOF OG | $\text{Fe}$ , $\text{FeO}$ , $\text{CaCO}_3$                                                                             |
| BOF LT | $\text{Fe}_3\text{O}_4/\text{ZnFe}_2\text{O}_4$ , $\text{Fe}$ , $\text{CaCO}_3$ , $\text{FeO}$ , $\text{Fe}_2\text{O}_3$ |
